# Supplementary material for: Printability of (Quasi-)Solid Polysiloxane Electrolytes for Online Dye-Sensitized Solar Cell Fabrication
Source: MDPI journal article supplement (doi:10.3390/coatings13071164), 2023-06-27
Supplement: s1 [file s1]

## Supplementary Materials

**Table S1.** Performance of the thermosetting and thermoplastic electrolytes in DSSCs. Please refer to corresponding references for electrolyte components abbreviation full description.

| Composition of the electrolytes                                                                                                                                         | Electrolyte deposition + curing method | $\sigma$ (mS/cm) | $\eta$ (%) | Stability                                              | Ref   |
|-------------------------------------------------------------------------------------------------------------------------------------------------------------------------|----------------------------------------|------------------|------------|--------------------------------------------------------|-------|
| Thermosetting electrolytes                                                                                                                                              |                                        |                  |            |                                                        |       |
| PU membrane soaked in 0.6 M DMPII + 0.1M LiI + 0.05M I <sub>2</sub> + 0.5M TBP in MPN                                                                                   | Casting + hot pressing at 100 °C       | 12.3             | 7.7        | 1000 h at-rest stability                               | [101] |
| HII PIL + DMII wt./wt, 1/0.7 (E2)                                                                                                                                       | Drop-casting + heating at 40 °C        | 1.26             | 6.5        | At-rest, room temp                                     | [102] |
| BEMA/PEGMA (1/1 ratio) in 0.22 M Co(II)(bpy) <sub>3</sub> (PF <sub>6</sub> ) <sub>2</sub> + 50 mM Co(III)(bpy) <sub>3</sub> (PF <sub>6</sub> ) <sub>3</sub> + 0.2 M TBP | Vacuum back-filling + UV curing        | -                | 6.4        | 1500 h at 60°C in the dark<br>1800 h at 40°C and 1 Sun | [106] |
| 0.05 M I <sub>2</sub> , 0.25 M PMI, 0.25 M DMPII, 0.5 M TBP, 25mM LITFSI                                                                                                | Vacuum filling + UV curing             | 2                | 6.15       | 1 sun light soaking at 50 °C.                          | [105] |
| PIL+ C14MImI                                                                                                                                                            | Pressing + 60 °C for 12h               | 2                | 5.8        | 1000 h at 85% RH and 30 °C                             | [103] |
| 10M C14MImI + 2M I <sub>2</sub> + 2M TBP + 1M LiClO <sub>4</sub> in dichloromethane                                                                                     | Pressing + 60 °C for 12h               | 0.4              | 3.5        | 2000 h at 85% RH and 30°C                              | [104] |
| PEGMA:PEGDA membrane soaked in 0.5M NaI/0.05M I <sub>2</sub> in ACN                                                                                                     | Pressing + UV curing                   | -                | 3.2        | -                                                      | [107] |
| Thermoplastic electrolytes                                                                                                                                              |                                        |                  |            |                                                        |       |
| 16 wt% SGT-643 + 1 wt% SiO <sub>2</sub> in 0.1 M LiI + 0.5 M I <sub>2</sub> + 0.7 M DMPII + 0.9 M TBP in ACN.                                                           | Vacuum filling                         | 2.96             | 10.2       | 500 h under 1 SUN and 50 °C                            | [120] |
| Acetamide 5 wt. % in 0.1M of LiI/I <sub>2</sub>                                                                                                                         | Pressing                               | 0.6              | 9          | -                                                      | [72]  |
| 9 wt. % of (PEO/PVDF) + 4 wt. % TiO <sub>2</sub> + 0.1 M LiI + 50 mM I <sub>2</sub> + 0.8 M DMIMI + 0.5 M TBP + 0.1 M GuSCN in MPN                                      | Doctor-blade + hot pressing at 100 °C  | 1.85             | 8.9        | 60 °C in dark.                                         | [73]  |
| PAA-PEG + PANI-G + PtNi                                                                                                                                                 | Pressing                               | 18.4             | 8.64       | 10 days IN (20-28 °C, 40-60% RH)                       | [121] |
| GPE + 4 wt. % of urea dissolved in LiI/I <sub>2</sub>                                                                                                                   | Pressing                               | 0.43             | 6.8        | -                                                      | [110] |
| 10 wt. % PVDF-HFP + 5 wt% HPMC + 0.1M I <sub>2</sub> + 0.1 M NaI + 0.5 M TBP + 0.5 M BMII in ACN                                                                        | Pressing                               | 0.9              | 5.3        | -                                                      | [111] |
| PEG gel 3 wt. % in 0.2 M of Co (II), 0.02 M of Co (III), 0.1 M of LiClO <sub>4</sub> , 0.5 M BPTP                                                                       | Pressing                               | 1.15             | 5.1        | -                                                      | [123] |
| 5% PEO-EM-AGE + 0.2 M [Co(bpy) <sub>3</sub> ] <sup>2+</sup> + 0.07M [Co(bpy) <sub>3</sub> ] <sup>3+</sup> + 0.05M Li <sup>+</sup> + 0.2M TBP                            | Vacuum filling                         | -                | 3.6        | 1000h under 1 Sun and 40 °C                            | [109] |
| PU-PEG 2000 soaked in LE (1.5 g NaI, 0.15 g I <sub>2</sub> , and 15 mL PC)                                                                                              | Pressing                               | 3.42             | 3.41       | At-rest at RT                                          | [122] |

**Table S2.** Photovoltaic performances of DSSCs using liquid and (quasi-) solid electrolytes based on ionic liquids under AM 1.5 simulated solar light irradiation. Please refer to corresponding references for electrolyte components abbreviation full description.

| Electrolyte physical state | Composition of the electrolytes                                                                                                                                   | Electrolyte deposition                   | $\sigma$ (mS/cm) | $J_{sc}$ (mA/cm <sup>2</sup> ) | $V_{oc}$ (V) | FF (%) | $\eta$ (%) | Stability            | Ref   |
|----------------------------|-------------------------------------------------------------------------------------------------------------------------------------------------------------------|------------------------------------------|------------------|--------------------------------|--------------|--------|------------|----------------------|-------|
| Liquid                     | 0.05 M I <sub>2</sub> , 0.075 M LiI, 0.3 M TBP, 0.025 M THAI, 0.6M DMPI                                                                                           | Vacuum filling                           | -                | 24.30                          | 0.72         | 68     | 12         | -                    | [128] |
|                            | 0.05 M I <sub>2</sub> , 0.02 M LiI, 0.3 M TBP, 0.05 M THAI, 0.6M EMIMI in ACN:THF (95:5, v:v)                                                                     | Filling                                  | 10.9             | 22.2                           | 0.71         | 73     | 11.5       | -                    | [125] |
|                            | 0.07 M I <sub>2</sub> , 0.05 M LiI, 0.05 M NaI, 0.50 M DMPII, 0.10 M EMIMI, 0.05 M TBAI, 0.05 M THAI, 0.40 M TBP, and 0.10 M GuSCN in MeCN/VN/THF (8 : 1 : 1 v/v) | Injection filling                        | -                | 18.36                          | 1.01         | 77     | 11.2       | -                    | [31]  |
|                            | HeMII/NMBI/GuNCS                                                                                                                                                  | Vacuum filling                           | 6                | 13.52                          | 0.72         | 70     | 6.85       | -                    | [129] |
|                            | BMTII in ACN (concentration unknown)                                                                                                                              | Injection filling                        | 0.8              | 12.49                          | 0.73         | 64     | 6.63       | 2 months at RT       | [130] |
|                            | 0.05 M I <sub>2</sub> , 0.1 M LiI, 0.6 M DMPII, 0.5 M TBP, BMIBr                                                                                                  | Injection filling                        | -                | 12.2                           | 0.80         | 67     | 6.54       | 45 days at RT        | [131] |
|                            | 0.24 M I <sub>2</sub> , 0.78M LiI, 3.92 M TBP, 4.71M P122-TFSA, 2% SiO <sub>2</sub>                                                                               | Vacuum filling                           | -                | 12.4                           | 0.72         | 65     | 5.86       | 5 months at RT       | [132] |
| Quasi-solid                | 7.5 wt. % I <sub>2</sub> , 22.7 wt.% TPAI, 8 wt.% BMIMI, 0.08 g PhCh , 0.02 g PEO, 0.50 g EC, 0.60 g DMF, TPAI                                                    | Pressing                                 | 13.5             | 19.61                          | 0.71         | 71     | 9.61       | -                    | [133] |
|                            | 0.05 M I <sub>2</sub> , 0.1 M LiI, 0.6 M PMIMI, 0.1 M GuSCN, 0.5 M TBP, and ACN + 20 wt% P(VA-co-MMA) + 5% TiO <sub>2</sub> filler                                | Screen-printing and pressing             | 7.5              | 16.93                          | 0.75         | 74     | 9.4        | 1000h at 30 °C       | [71]  |
|                            | 50 mM I <sub>2</sub> , 0.1 M LiI, 0.8 M DMIMI, 0.5 M tBP, 0.1 M GuSCN, MPN solvent + 9 wt.% PEO/PVDF with 0.6 wt% ZnO                                             | Screen-printing + pressing               | -                | 14.39                          | 0.80         | 73     | 8.50       | 1200h at RT          | [41]  |
| Solid                      | 50 mM I <sub>2</sub> , 0.1 M LiI, 0.1 M GuSCN, 0.5 M TBP, 0.8 M DMIMI in MPN + PEO/PMMA (7/3) + 10 wt% TiO <sub>2</sub>                                           | Screen-printing + hot pressing at 100 °C | 1.29             | 16.64                          | 0.77         | 71     | 9.12       | 150h in RT           | [134] |
|                            | 50 mM I <sub>2</sub> , 0.1M LiI, 0.8M DMIMI, 0.5MtBP, 0.1N GuSCN in MPN + 9% PEO/PVDF + 4% TiO <sub>2</sub>                                                       | Screen-printing + hot pressing at 100 °C | 1.8              | 16.10                          | 0.77         | 72     | 8.91       | 500h at 60°C in dark | [73]  |

**Table S3.** Best photovoltaic performances for the iodide containing PILs - based DSSCs reported in literature. Please refer to corresponding references for electrolyte components abbreviation full description.

| Electrolyte composition                                                                                         | Electrolyte deposition   | $\sigma$<br>(mS/cm <sup>2</sup> ) | J <sub>sc</sub><br>(mA/cm <sup>2</sup> ) | V <sub>oc</sub><br>(V) | FF<br>(%) | PCE<br>(%) | Stability                             | Ref.  |
|-----------------------------------------------------------------------------------------------------------------|--------------------------|-----------------------------------|------------------------------------------|------------------------|-----------|------------|---------------------------------------|-------|
| 0.1 M LiI, 0.05 M I <sub>2</sub> , 0.6 M DMPI, 0.5 M TBP in ACN/MPN20 + 20 wt.% POEI-TEMPO                      | Injection filling        | -                                 | 16.60                                    | 0.81                   | 73        | 9.83       | 2000h at 100 mW/cm <sup>2</sup>       | [146] |
| FII-P membrane swelled with 0.6 M DMPI, 0.035 M I <sub>2</sub> , 0.1 M GuSCN, 0.5 M TBP, in MPN/ACN             | Pressing                 | 11.5                              | 17.03                                    | 0.78                   | -         | 9.26       | 1500h                                 | [148] |
| 30 wt% POEI-IS, 0.2 M KSeCN, 0.05 M (SeCN) <sub>2</sub> in ACN                                                  | Injection filling        | 7.0                               | 13.85                                    | 0.82                   | 71        | 8.18       | 1000h RT                              | [151] |
| PEBII                                                                                                           | Pressing                 | 0.2                               | 19.0                                     | 0.74                   | 58        | 8.0        | -                                     | [150] |
| 0.1 M LiI, 0.05 M I <sub>2</sub> , 0.5 M TBP and 0.3 M POEI-II in ACN/MPN                                       | Drop casted              | 10.4                              | 13.97                                    | 0.78                   | 66        | 7.19       | 1000h in dark at 50 °C                | [152] |
| HII/DMIMI 1 :0.7, I <sub>2</sub> in 1,6-Bis(1H-imidazole-1-yl)hexane                                            | Drop casting + RT curing | 1.3                               | 11.69                                    | 0.79                   | 71        | 6.55       | 600h RT                               | [102] |
| 0.05 M I <sub>2</sub> , 0.05 M TBP, 16 wt.% PMAPI in GB                                                         | Drop casting             | 4.9                               | 14.20                                    | 0.80                   | 57        | 6.45       | 30 days in dark                       | [147] |
| PMMA/PIL/PIN membrane swelled with 0.1 M LiI, 0.05 M I <sub>2</sub> , 0.5 M TBP, 0.6 M of PMIMI in VN:ACN 15:85 | Pressing + RT curing     | 5.8                               | 12.8                                     | 0.79                   | 58        | 5.96       | 100h at RT and 100 mW/cm <sup>2</sup> | [73]  |
